# Supplementary material for: DNA methylation is reconfigured at the onset of reproduction in rice shoot apical meristem
Source: PubMed Central journal article supplement (PMC7429860; doi:10.1038/s41467-020-17963-2), 2020-08-14
Supplement: 41467_2020_17963_MOESM3_ESM.pdf [file 41467_2020_17963_MOESM3_ESM.pdf]

## **Descriptions of Additional Supplementary Files**

### **Supplementary Movie 1**

**Description:** A SAM was isolated from a rice seedling by hand dissection under microscopy.

### **Supplementary Data 1**

**Description:** Normalized emPAI values of proteome analysis.

### **Supplementary Data 2**

**Description:** Scores, number of peptides and sequence coverages for proteome analysis.
